# Supplementary material for: Covalent organic frameworks and electron mediator-based open circuit potential biosensor forin vivoelectrochemical measurements
Source: Royal Society of Chemistry journal article supplement (doi:10.1039/c8ay01386a), 2018-01-01
Supplement: c8ay01386a1.pdf [file c8ay01386a1.pdf]

Supporting Information

**Covalent organic frameworks and electron  
mediator-based open circuit potential biosensor for in  
vivo electrochemical measurements**

Dan Su, Bingwei Feng, Pengfei Xu, Qiang Zeng, Baixi Shan, Yonggui Song\*

*Jiangxi University of Traditional Chinese Medicine, 1688 Meiling Road,*

*Nanchang 330006, China.*

---

\*Corresponding author: Tel/Fax: +86 791 87119632. E-mail:  
songyonggui1999@163.com (Yonggui Song).

**Table S1.** A comparison of the performance of various GOD-based glucose biosensors.

| Glucose sensors                                       | Detection              | Linear            | Sensitivity                                                                 | Ref.      |
|-------------------------------------------------------|------------------------|-------------------|-----------------------------------------------------------------------------|-----------|
|                                                       | limit<br>$\mu\text{M}$ | range<br>mM       | $\mu\text{A mM}^{-1}\text{cm}^{-2}$<br>or $\text{mV mM}^{-1}\text{cm}^{-2}$ |           |
| CPE/GOx-SiO <sub>2</sub> /Lig/Fc                      | 145                    | 0.5-9.0           | 0.78                                                                        | S1        |
| GOD/NCNTs/KSC                                         | 1.9                    | 0.0058-<br>18.0   | 29.4                                                                        | S2        |
| 4-Amino<br>thiophenol/AuNP/<br>GOD-HRP/MUA-<br>MCH/Au | 5.4                    | 0.0165-<br>10.0   | 41.78                                                                       | S3        |
| GOD/ERGO<br>-MWCNTs                                   | 4.7                    | 0.01-6.5          | 7.95                                                                        | S4        |
| GOD/PVA<br>-Au-pphTEOS                                | 0.7                    | 1.0-8.0           | 43.22                                                                       | S5        |
| GOD/graphene-chitosan                                 | 20.0                   | 0.08-12.0         | 37.93                                                                       | S6        |
| GOD/Ag-<br>Pdop@CNTs                                  | 17.0                   | 0.05-1.1          | 3.1                                                                         | S7        |
| GOD/NECFE                                             | 0.36                   | 0.00108 -<br>8.50 | 46.55*                                                                      | This work |

\* This means that the units in such cases are ( $\text{mV mM}^{-1}\text{cm}^{-2}$ ) instead of ( $\mu\text{A mM}^{-1}\text{cm}^{-2}$ )

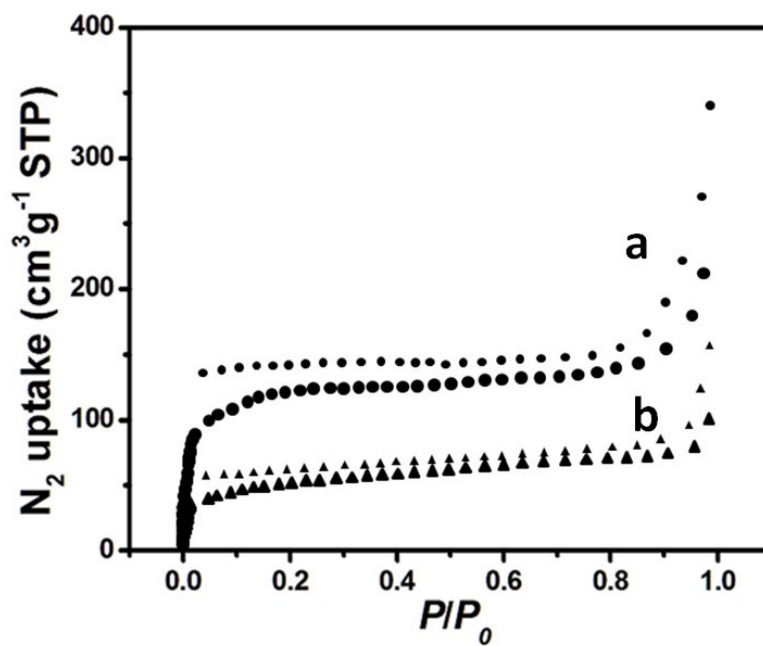

**Fig. S1.** Nitrogen adsorption-desorption isotherms of COF-LZU1 (circles) and GOD/DMFc/COF-LZU1 (triangles). Adsorption and desorption points are represented by big and little symbols, respectively.

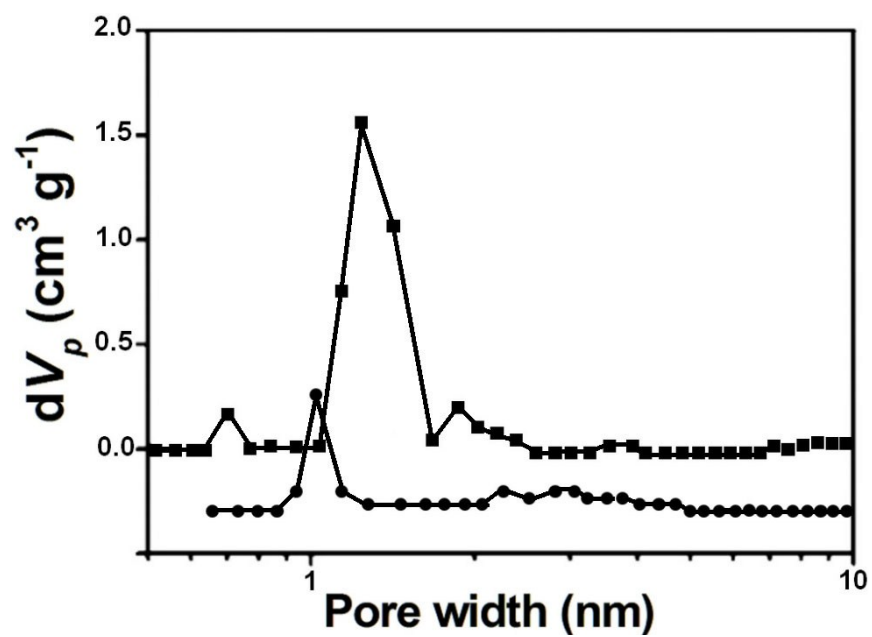

**Fig. S2.** Pore size distribution of COF-LZU1 (squares) and DMFc/COF-LZU1 (rounds).

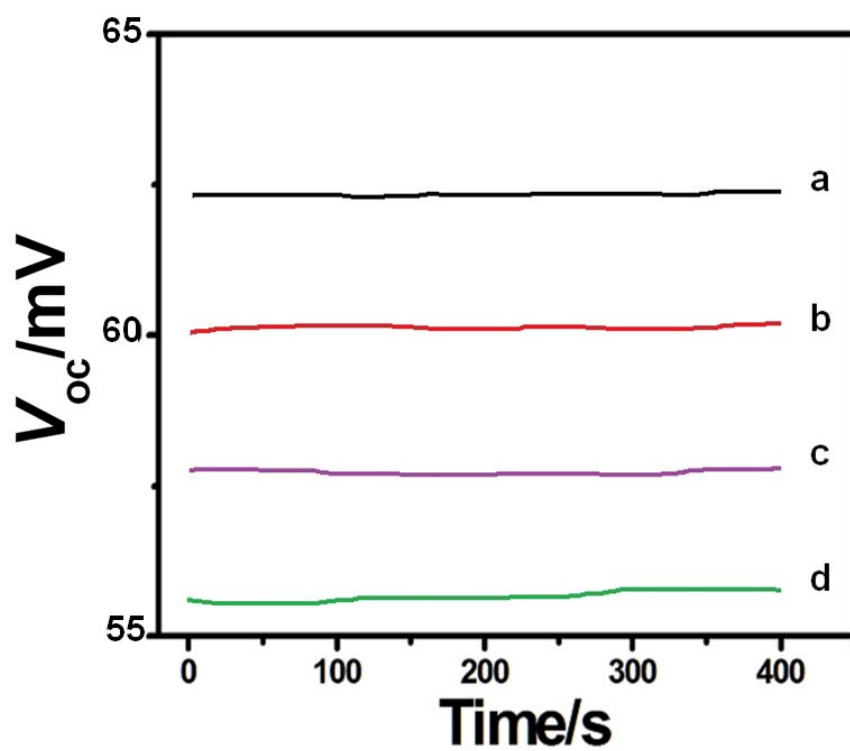

**Fig. S3.**  $V_{oc}$ -t curves obtained at GOD/COF-LZU1/CFMEs in the absence (a) and presence of 1.0 (b), 2.0 (c) and 3.0 mM (d) glucose in nitrogen saturated aCSF (pH7.4), respectively.

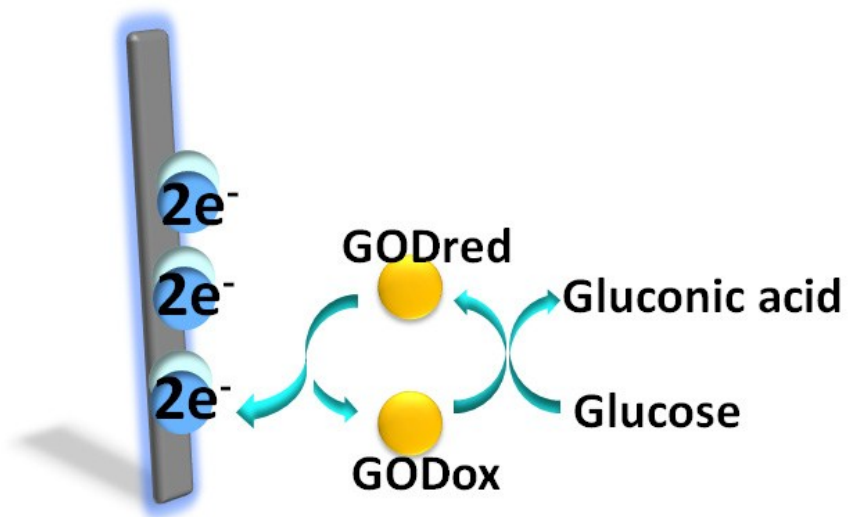

**Fig. S4.** Schematic illustration of GOD/COF-LZU1/CFMEs catalyzing glucose without mediator.

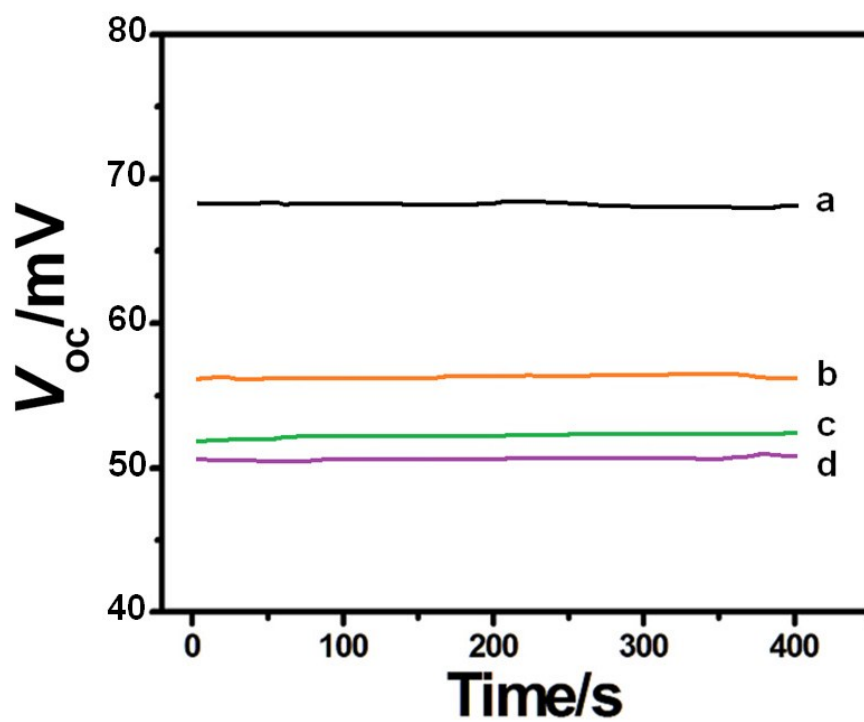

**Fig. S5.**  $V_{oc}$ -t curves obtained at GOD/DMFc/CFMEs in the absence (a) and presence of 1.0 (b), 2.0 (c) and 3.0 mM (d) glucose in nitrogen saturated aCSF (pH7.4), respectively.

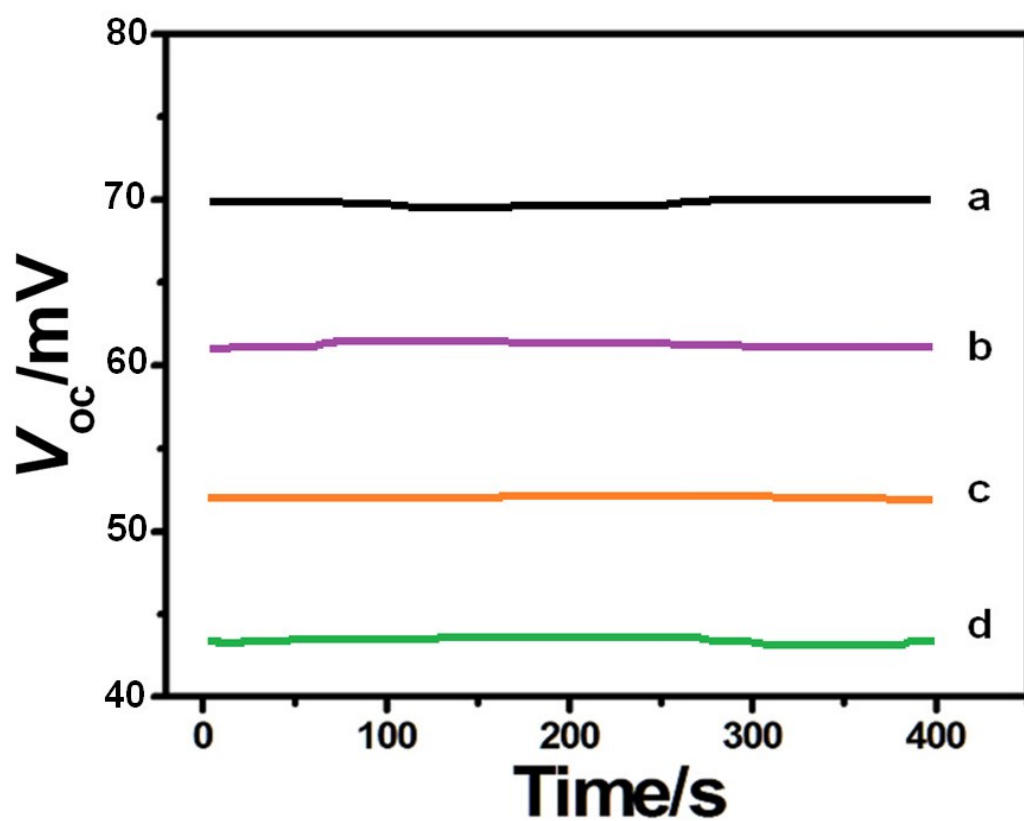

**Fig. S6.**  $V_{oc}$ -t curves obtained at GOD/DMFc/COF-LZU1/CFMEs in the absence (a) and presence of 1.0 (b), 2.0 (c) and 3.0 mM (d) glucose in nitrogen saturated aCSF (pH7.4), respectively.



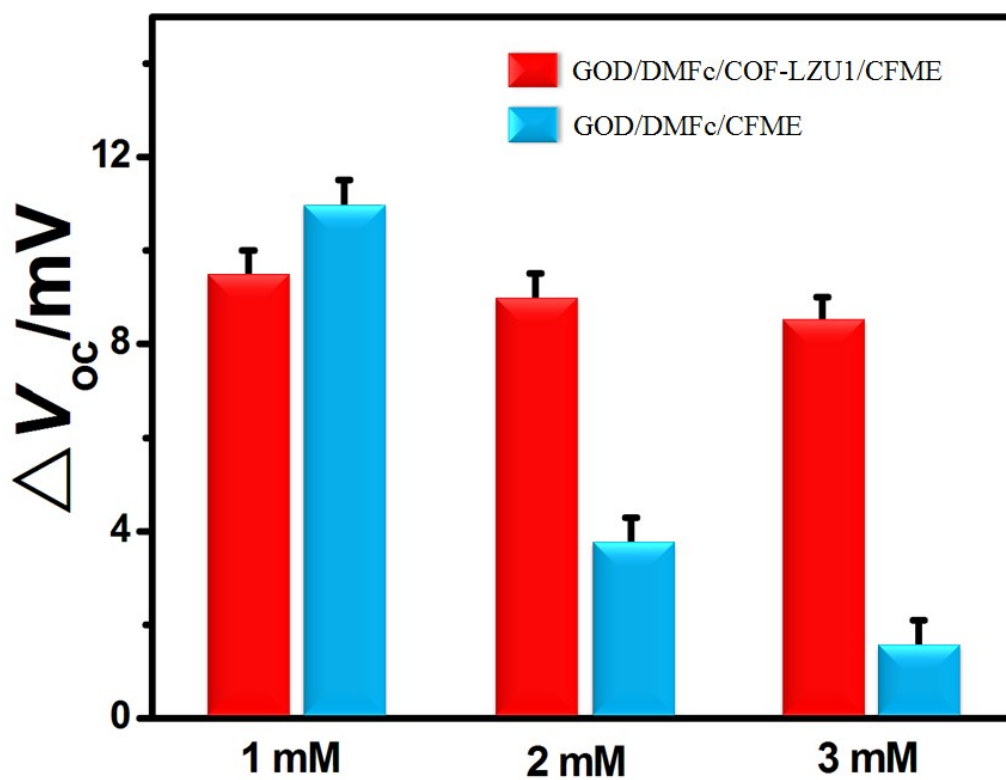

**Fig. S7.** The electrochemical response of GOD/DMFc/COF-LZU1/CFMEs and GOD/DMFc/CFMEs in the absence (a) and presence of 1.0 (b), 2.0 (c) and 3.0 mM (d) glucose in nitrogen saturated aCSF (pH7.4), respectively.

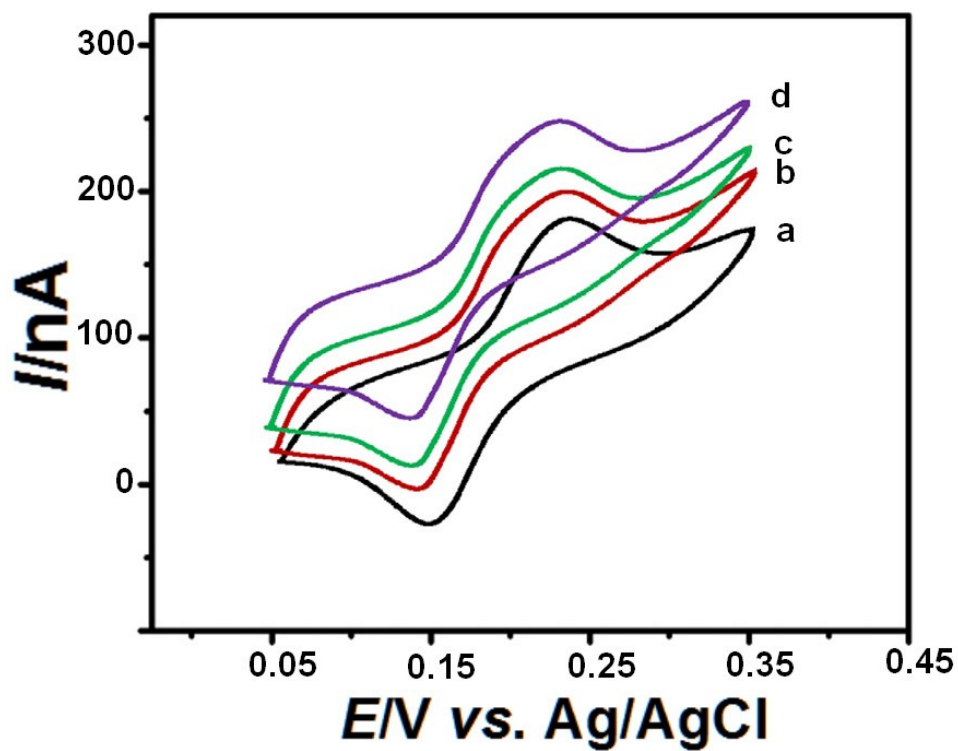

**Fig. S8.** CVs of the GOD/DMFc/COF-LZU1/CFMEs in the absence (a) and presence of 1.0 (b), 2.0 (c) and 5.0 mM (d) glucose in pH 7.4 nitrogen saturated aCSF at 100  $\text{mV s}^{-1}$ , respectively.

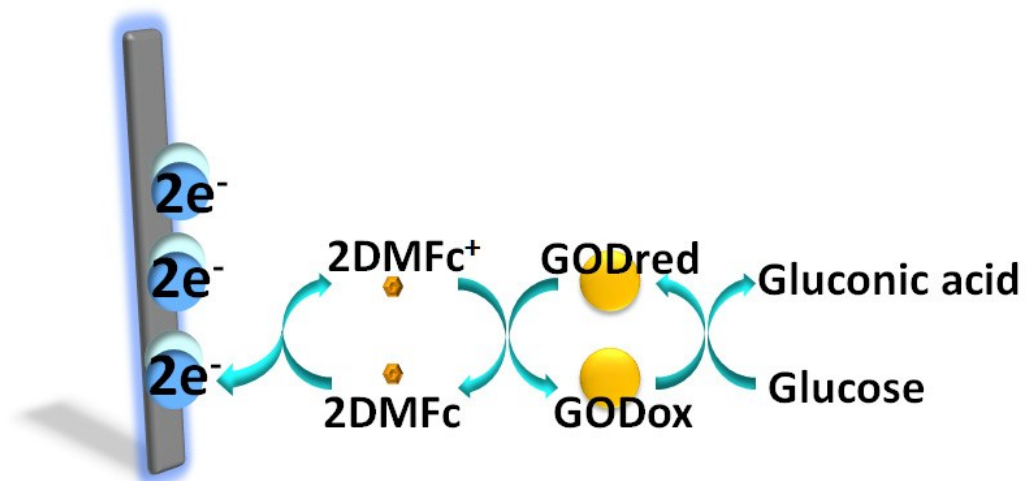

**Fig. S9.** Schematic illustration of GOD/DMFc/COF-LZU1/CFMEs catalyzing glucose.

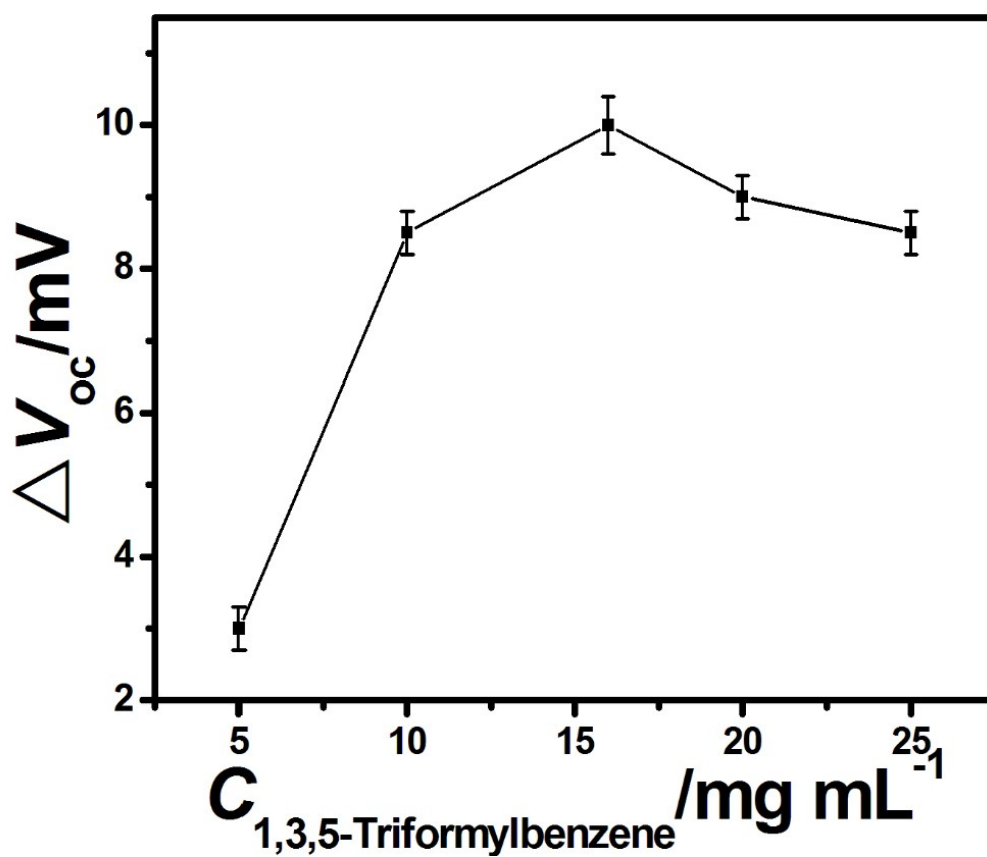

**Fig. S10.** The electrochemical response of the different GOD/DMFc/COF-LZU1/CFMEs in aCSF (pH7.4) containing 1.0 mM glucose to different 1,3,5-Triformylbenzene concentrations.

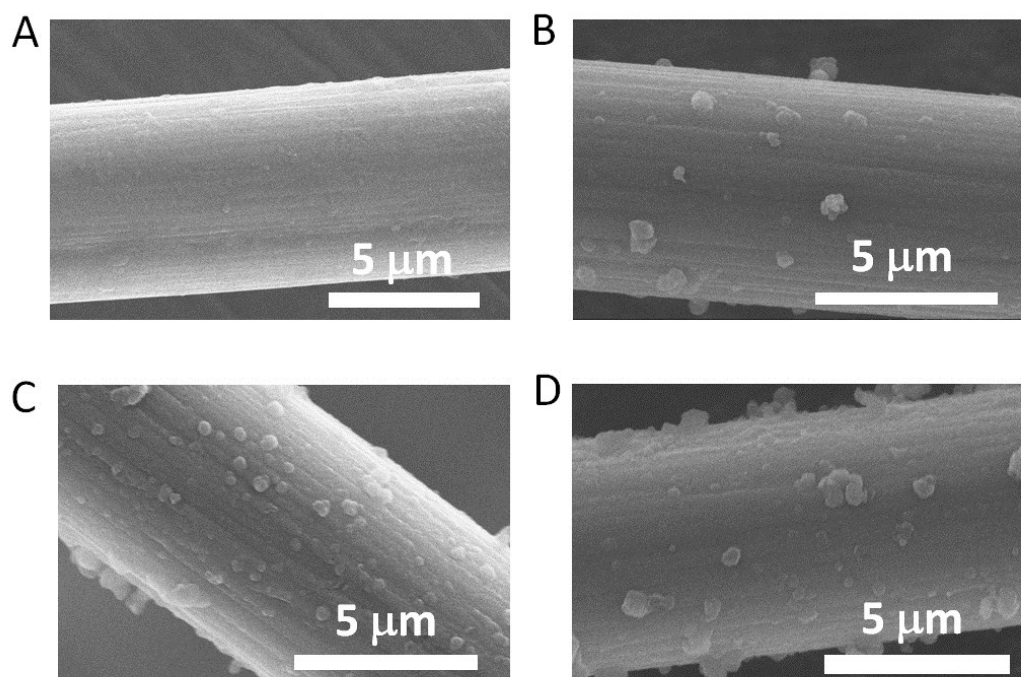

**Fig. S11.** SEM images of the GOD/DMFc/COF-LZU1/CFMEs prepared by (A) 5 mg ml<sup>-1</sup> (B) 10 mg ml<sup>-1</sup> (C) 16 mg ml<sup>-1</sup> (D) 25 mg ml<sup>-1</sup> 1,3,5-Triformylbenzene, and the concentration ratio of 1,3,5-Triformylbenzene and 1,4-diaminobenzene is 1:1.

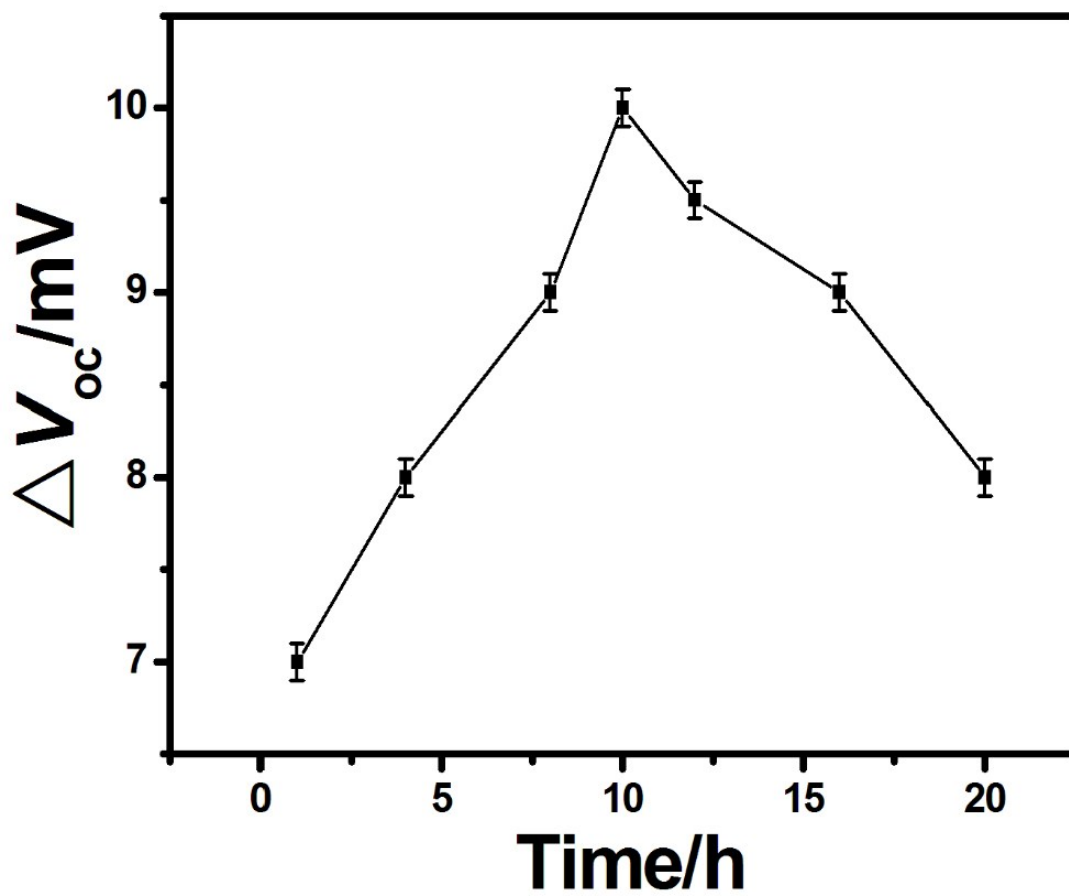

**Fig. S12.** The electrochemical response of the different GOD/DMFc/COF-LZU1/CFMEs in aCSF (pH7.4) containing 1.0 mM glucose to different soaking time in DMFc saturated solution.

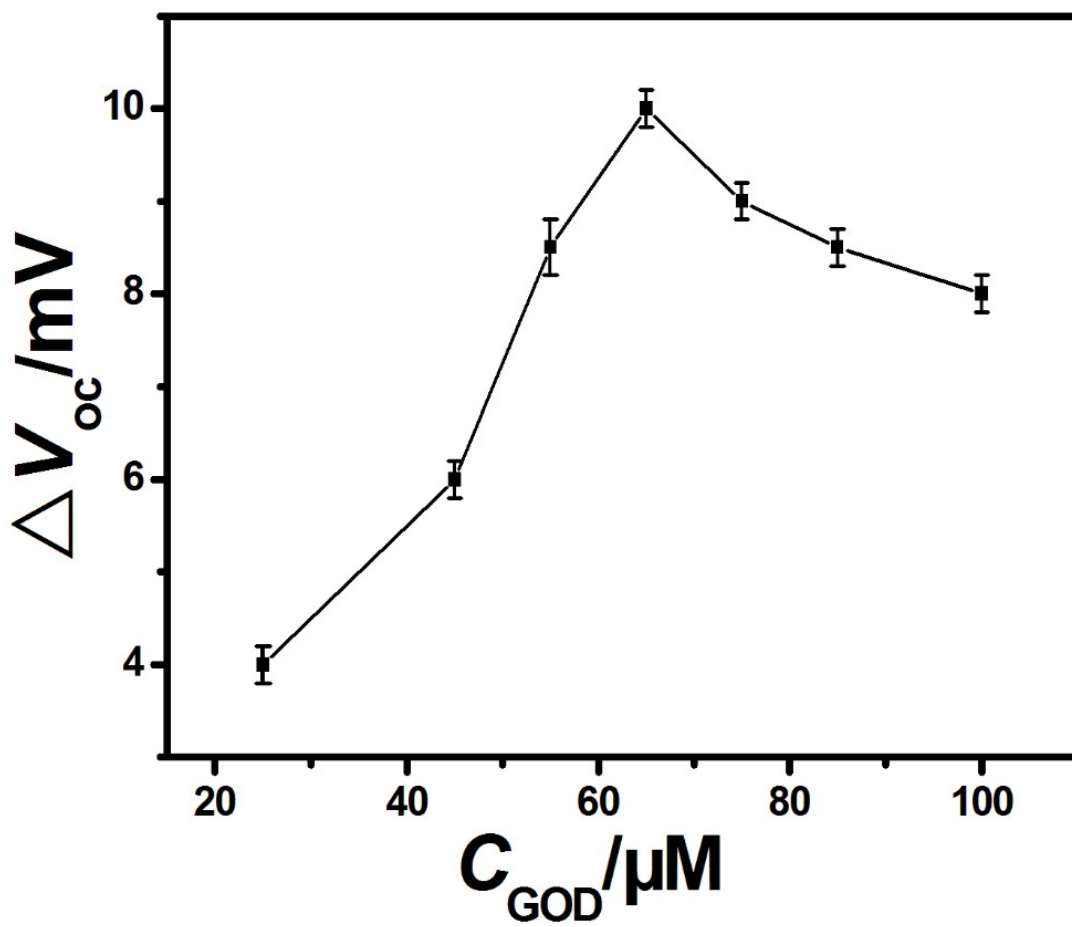

**Fig. S13.** The electrochemical response of the GOD/DMFc/COF-LZU1/CFMEs in aCSF (pH7.4) containing 1.0 mM glucose to different GOD solution.

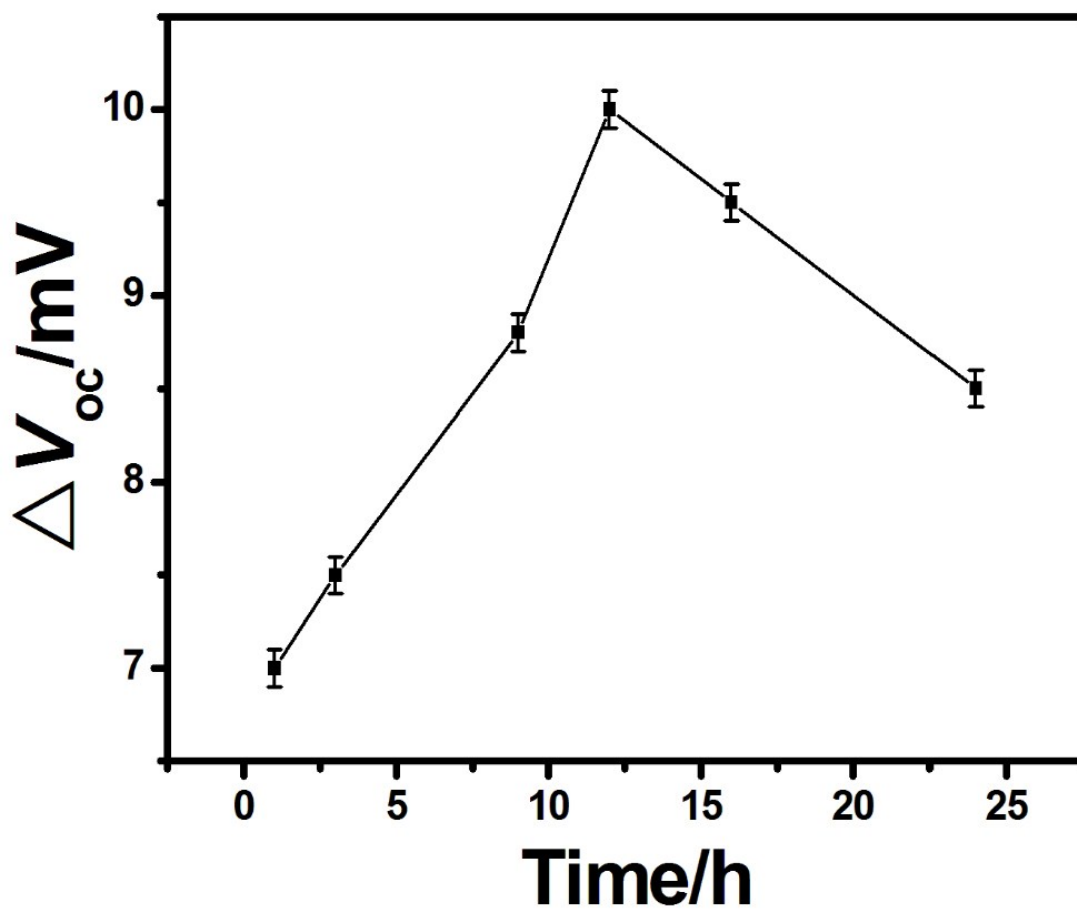

**Fig. S14.** The electrochemical response of the different GOD/DMFc/COF-LZU1/CFMEs in aCSF (pH7.4) containing 1.0 mM glucose to different soaking time in 65  $\mu$ M GOD solution.



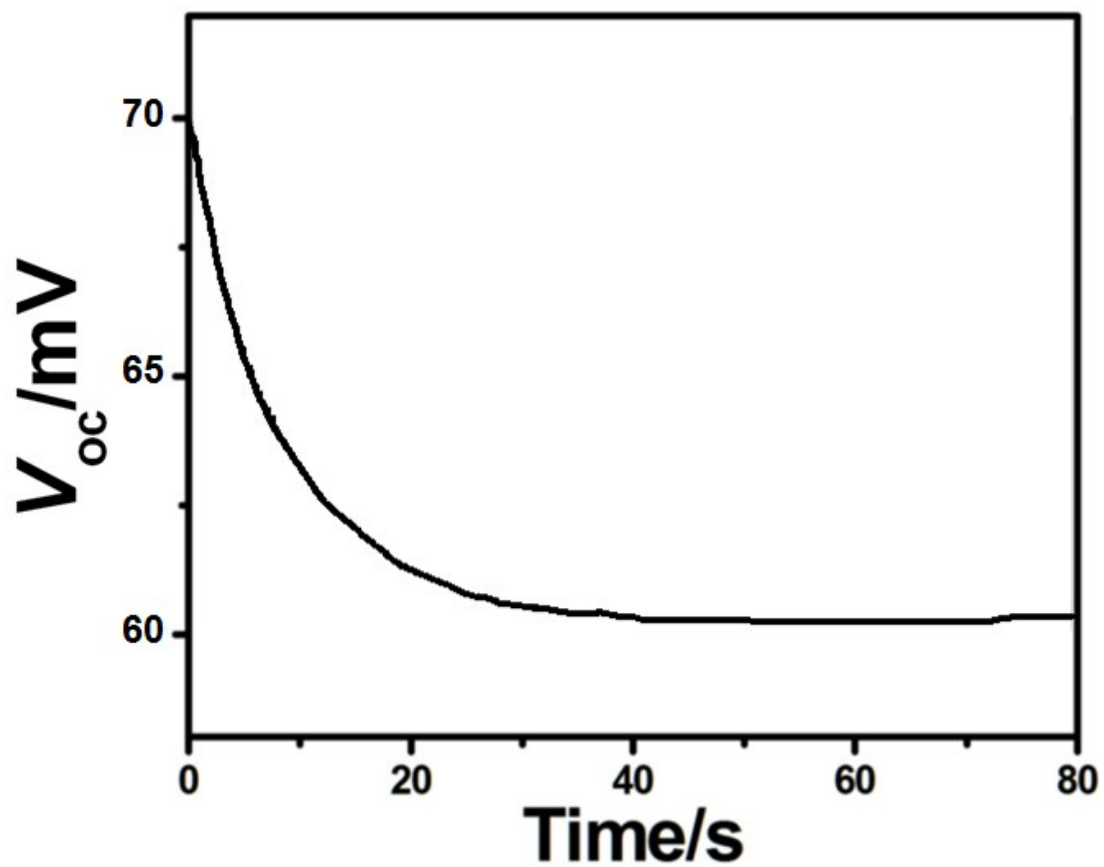

**Fig. S15.** Time-dependent signal response of GOD/DMFc/COF-LZU1/CFMEs for 1 mM glucose.

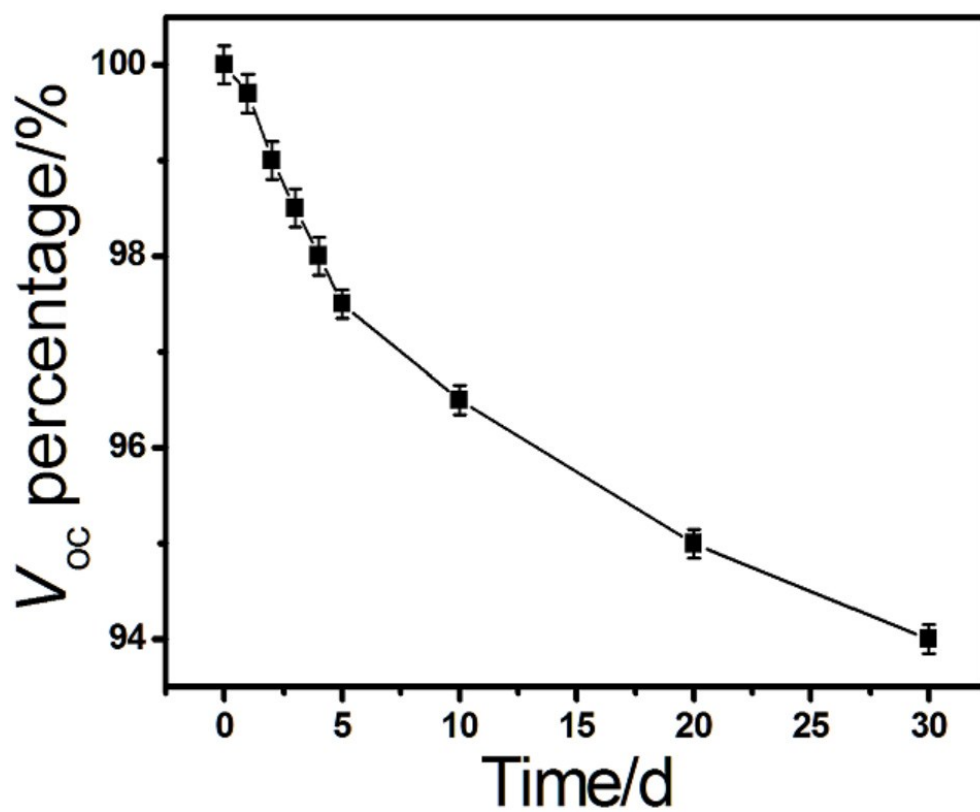

**Fig. S16.** Stability test of the GOD/DMFc/COF-LZU1/CFMEs in determination of 2.0 mM glucose in 30 days.

## References

- S1 A. Jędrzak, T. Rębiś, Ł. Kłapiszewski, J. Zdarta, G. Milczarek, T. Jesionowski, *Sens. Actuators B*, 2018, 256, 176-185.
- S2 Y. Song, X. Lu, Y. Li, Q. Guo, S. Chen, L. Mao, H. Hou and L. Wang, *Anal. Chem.*, 2016, 88, 1371-1377.
- S3 C. Gong, J. Chen, Y. Song, M. Sun, Y. Song, Q. Guo and L. Wang, *Anal. Methods*, 2016, 8, 1513-1519.
- S4 V. Mani, B. Devadas, S. Chen, *Biosens. Bioelectron.* 2013, 41, 309-315.
- S5 U. Lad, G. Kale, R. Bryaskova, *Anal. Chem.* 2013, 85, 6349-6355.
- S6 X. Kang, J. Wang,; Wu, H.; I. Aksay, J. Liu, Y. Lin, *Biosens. Bioelectron.* 2009, 25, 901-905.
- S7 Y. Wang, L. Liu, M. Li, S. Xu, F. Gao, *Biosens. Bioelectron.* 2011, 30, 107-111.
